# Supplementary material for: Autologous NK cells propagated and activated ex vivo decrease senescence markers in human PBMCs
Source: PubMed Central journal article supplement — Biochem Biophys Rep. 2022 Nov 11;32:101380. doi: 10.1016/j.bbrep.2022.101380 (PMC9661662; doi:10.1016/j.bbrep.2022.101380), 2022-11-11

## Results for cytokine/protein determination in plasma of donors A, B and C before and after NK cell treatment

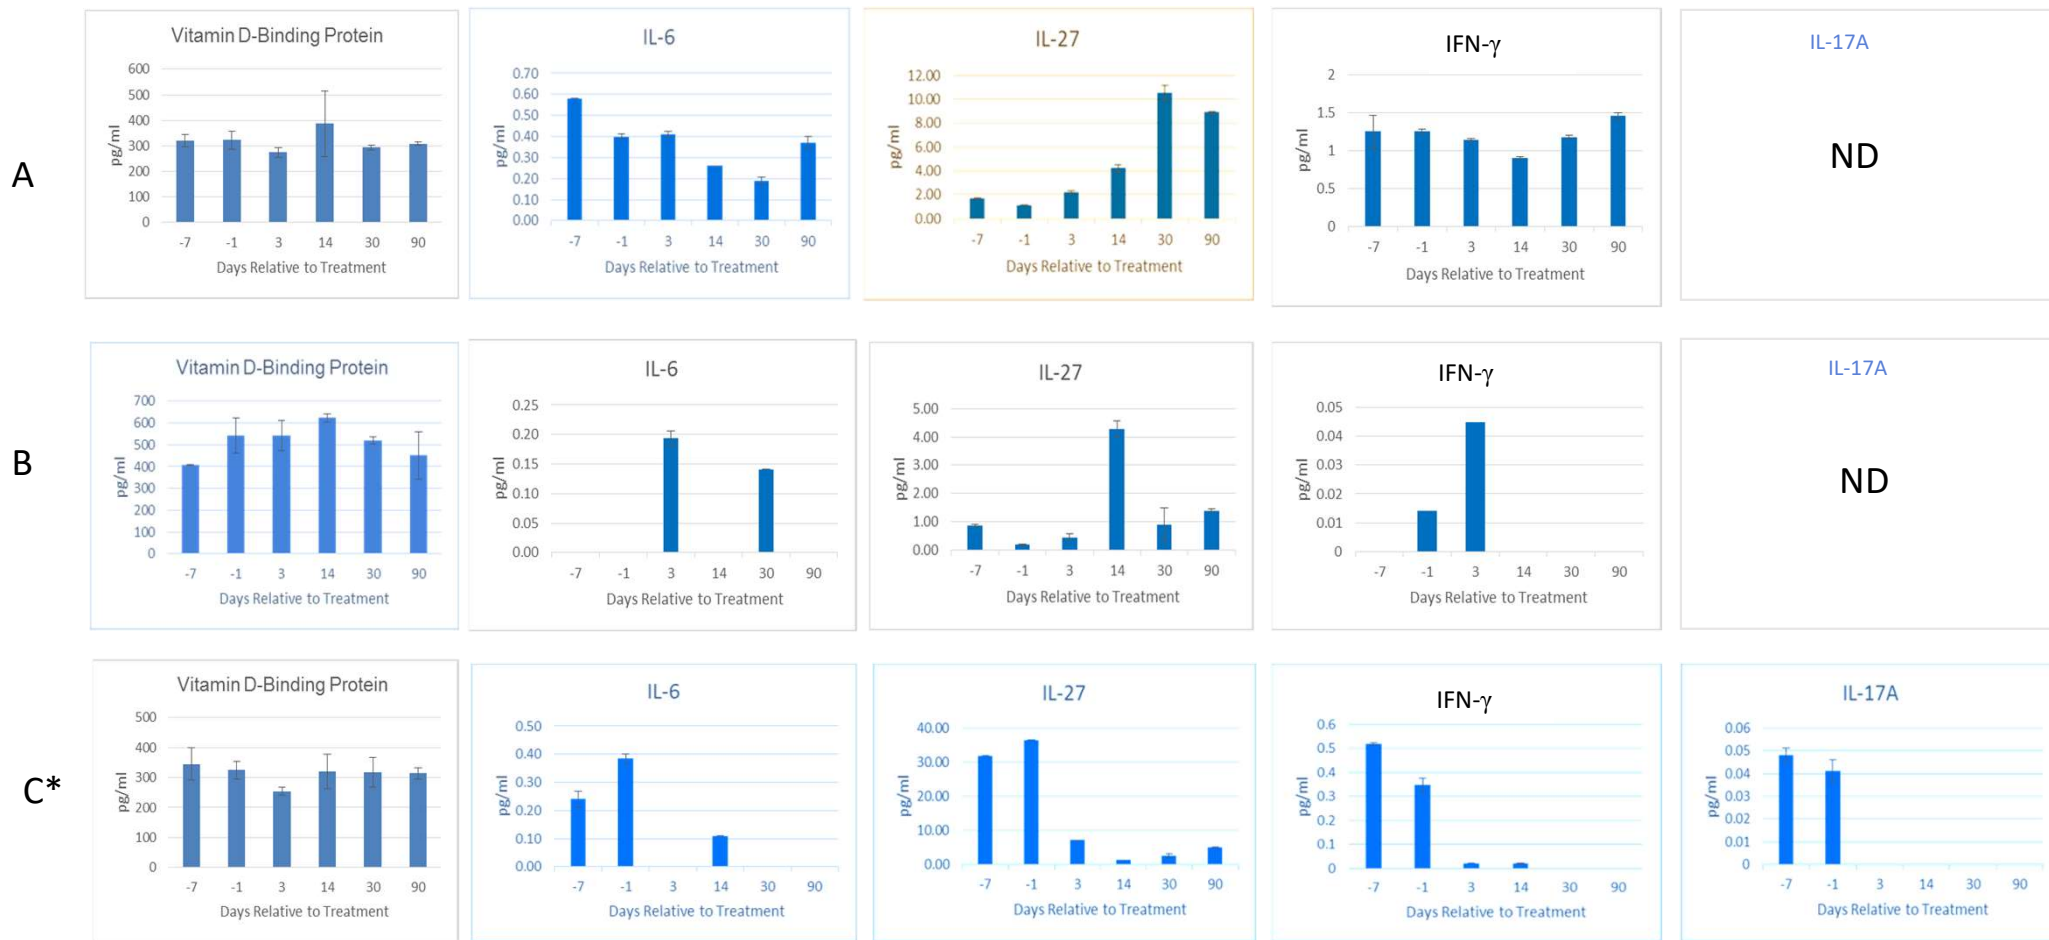

Not Detected (ND); \* Individual with a history of inflammatory bowel syndrome (IBS)

## Results for cytokine/protein determination in plasma of donors A, B and C before and after NK cell treatment

**A**

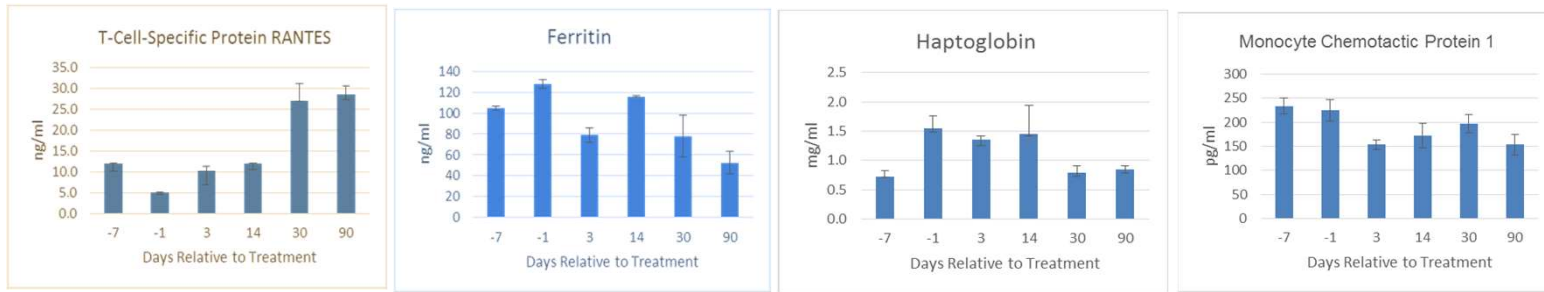

**B**

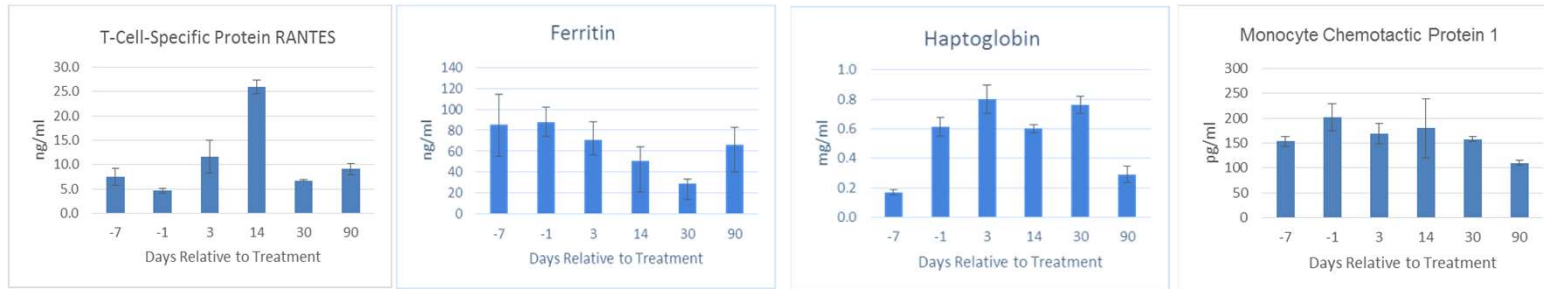

**C**

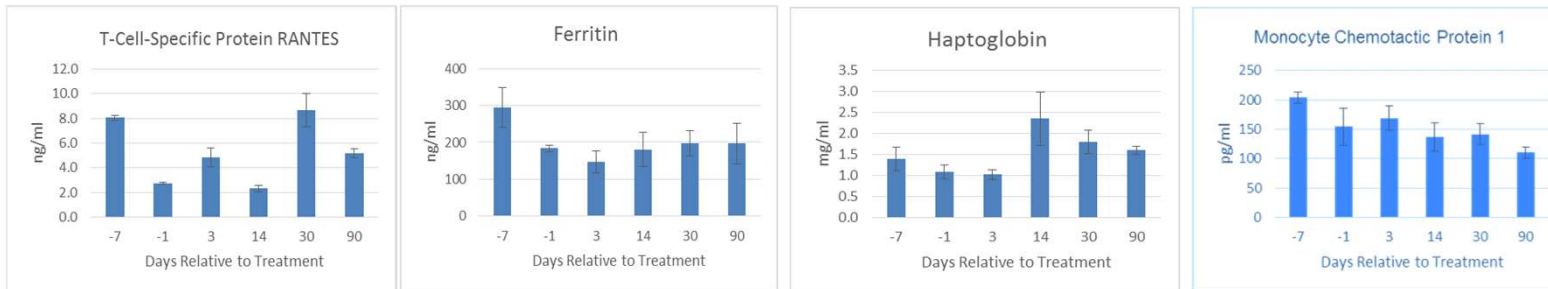

Supplement: mmc3.pdf [file mmc3.pdf]
